# Supplementary material for: Assessing the perceived changes in neighborhood physical and social environments and how they are associated with Chinese internal migrants’ mental health
Source: Springer Nature journal article supplement (doi:10.1186/s12889-021-11289-4), 2021-06-28

Supplementary materials: bivariate interactions between individual-level characteristics and mental health (GHQ)

Figure S 1 Bivariate partial dependence plots of physical health and age

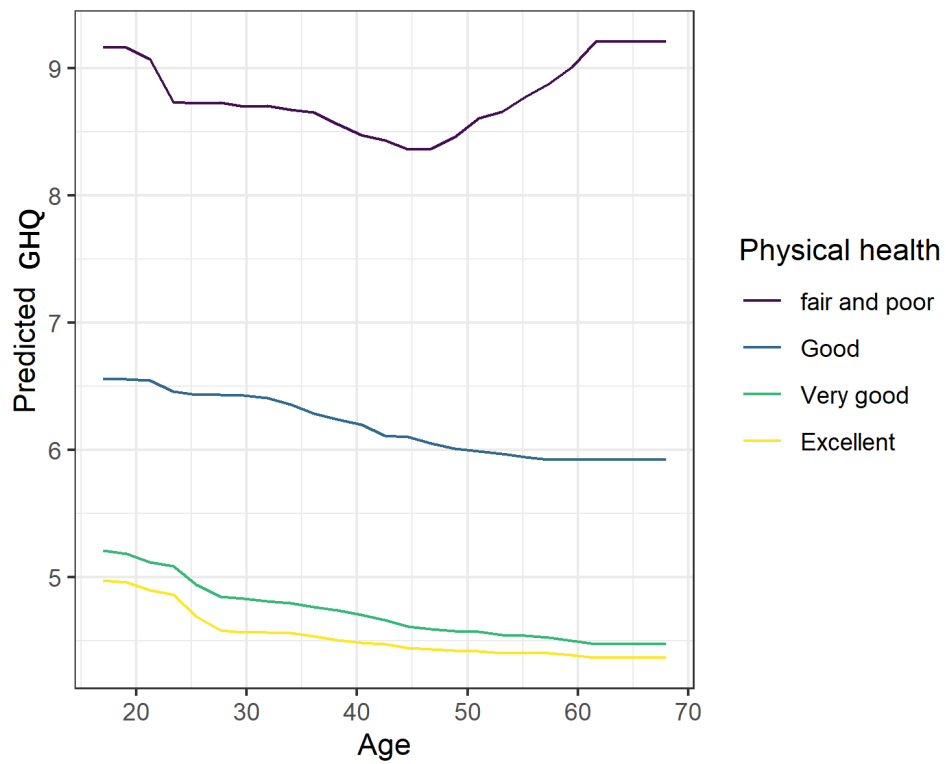

Figure S 2 Bivariate partial dependence plots of physical health and education

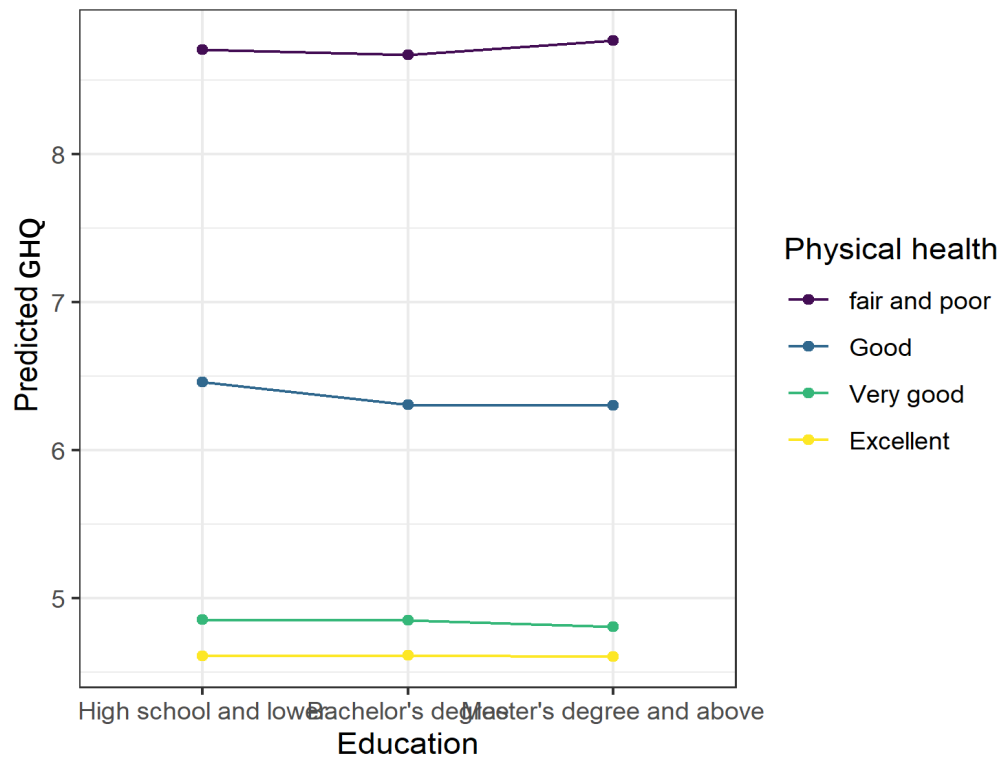

Figure S 3 Bivariate partial dependence plots of education and age

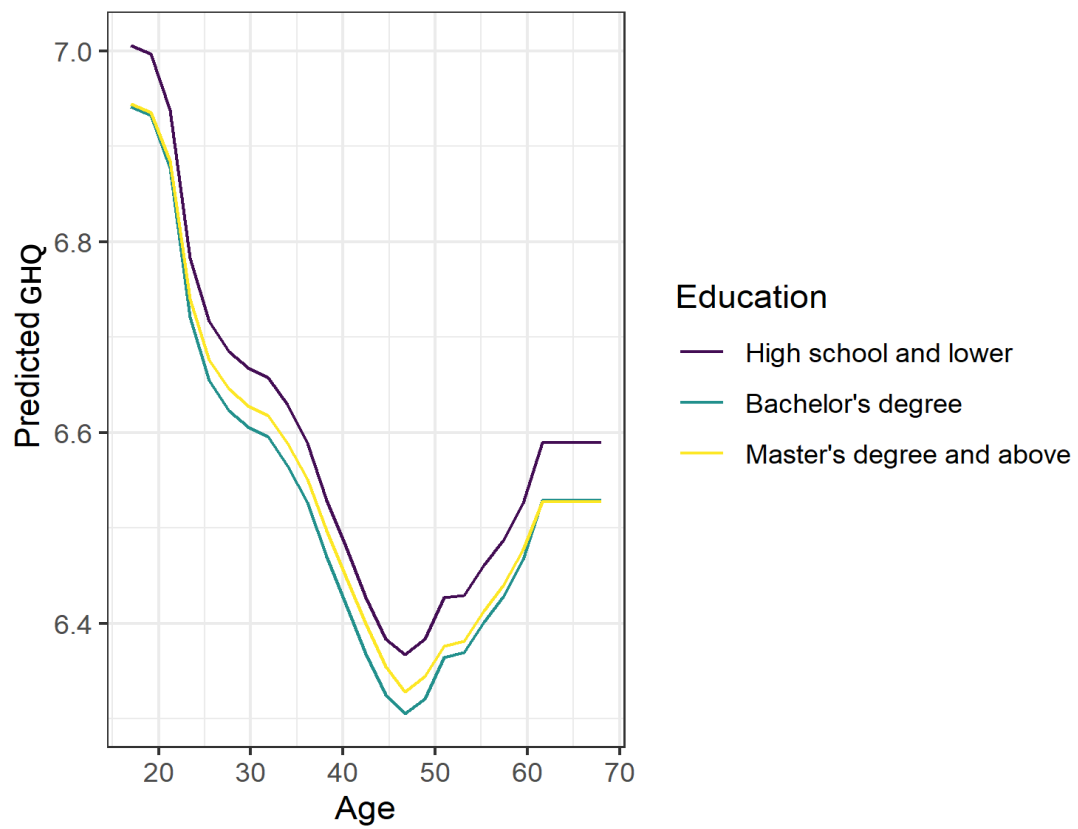

Figure S 4 Bivariate partial dependence plots of Hukou type and age

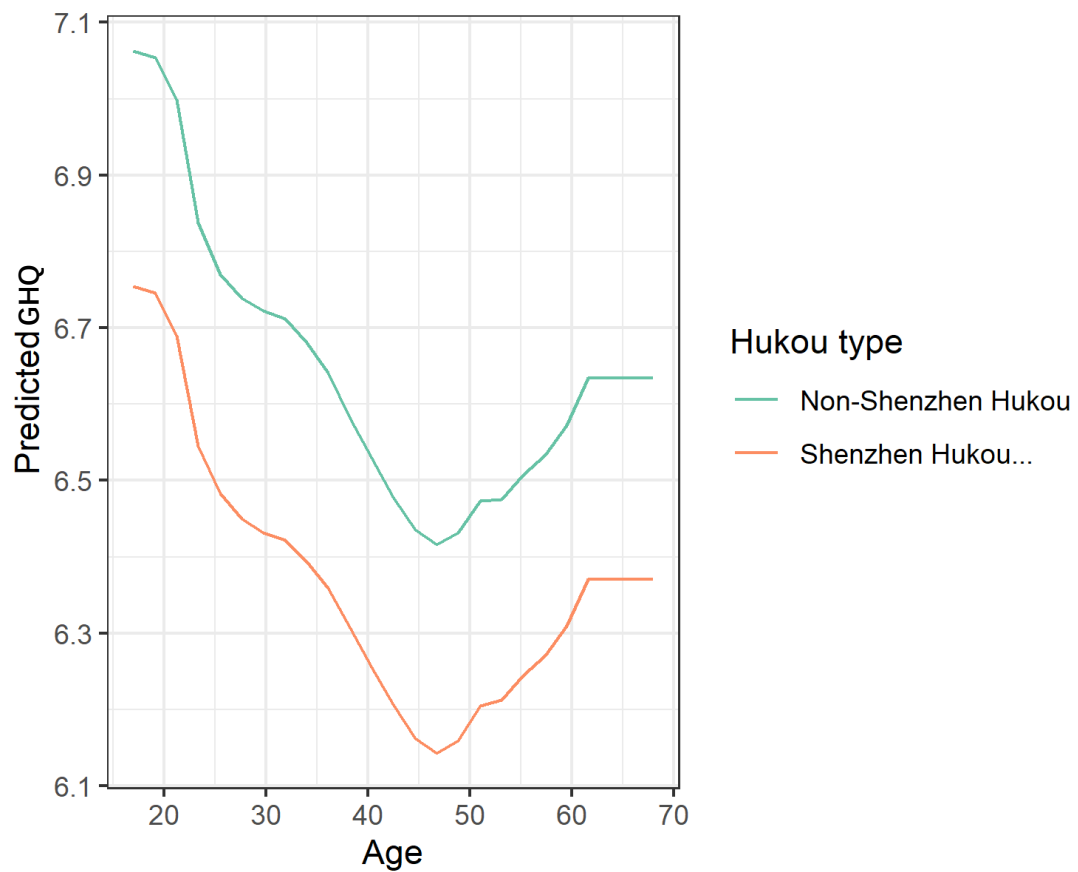

Figure S 5 Bivariate partial dependence plots of income group and age

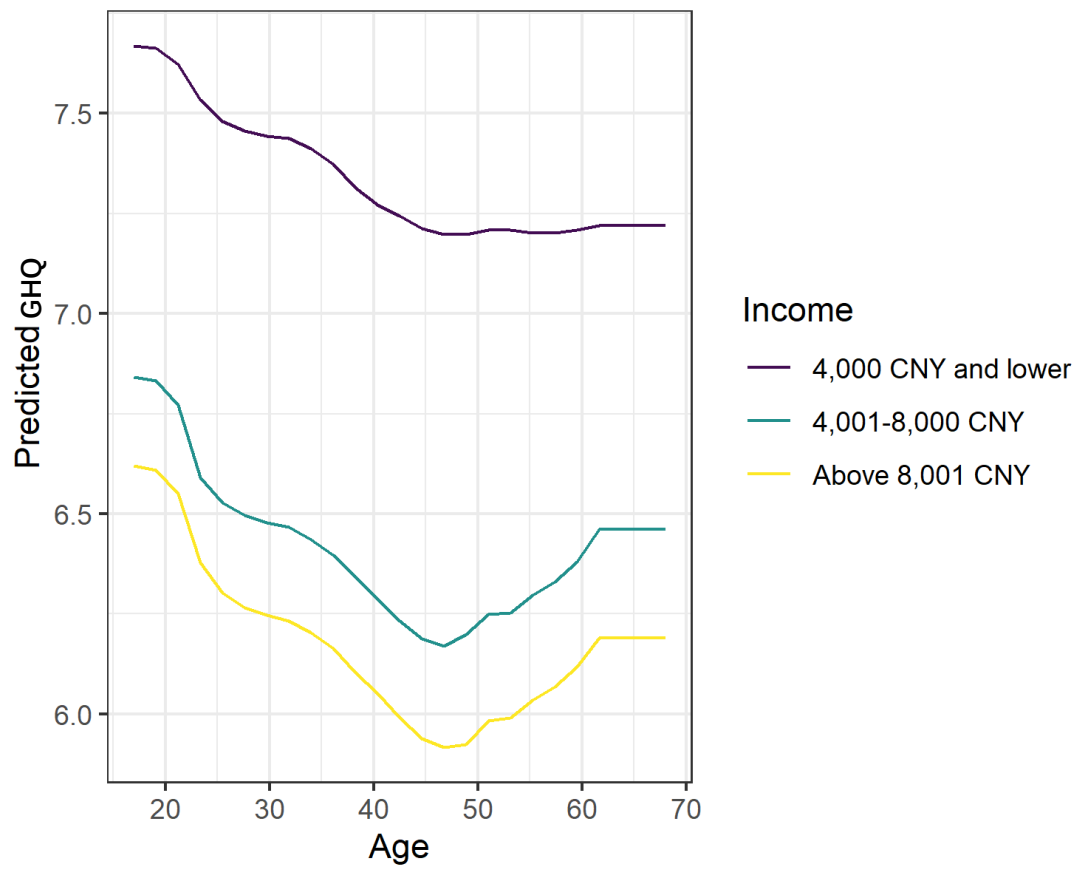

Figure S 6 Bivariate partial dependence plots of migration context and age

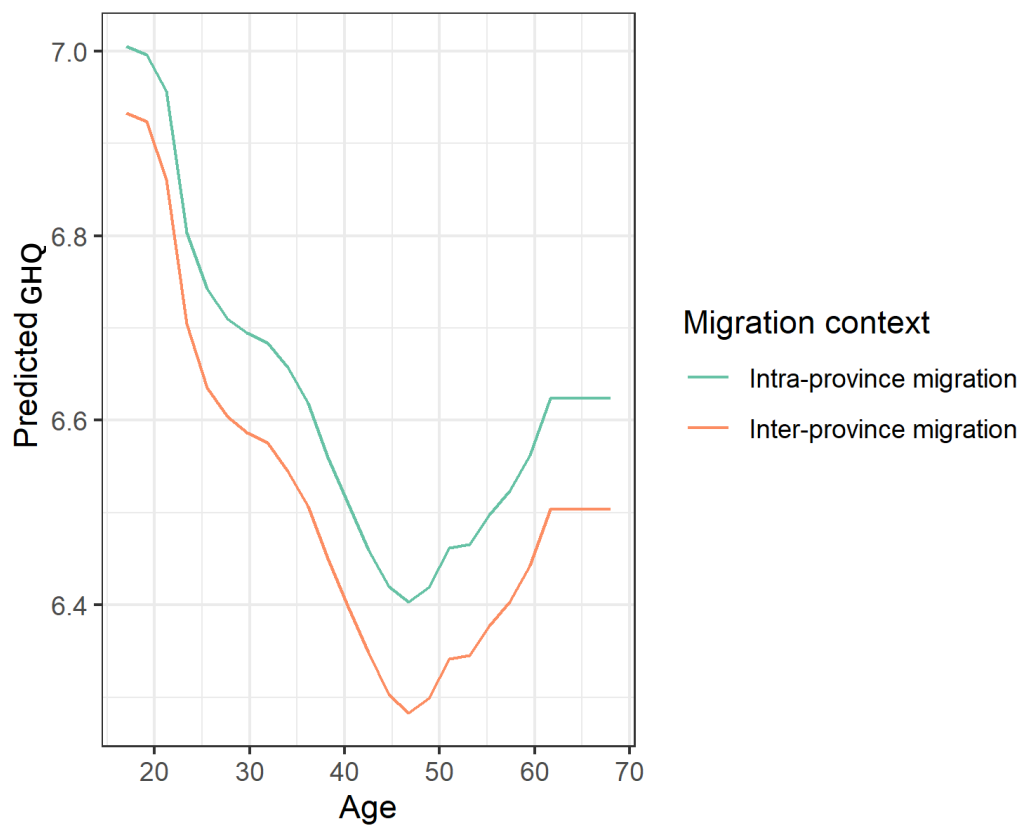

Figure S 7 Bivariate partial dependence plots of sex and education

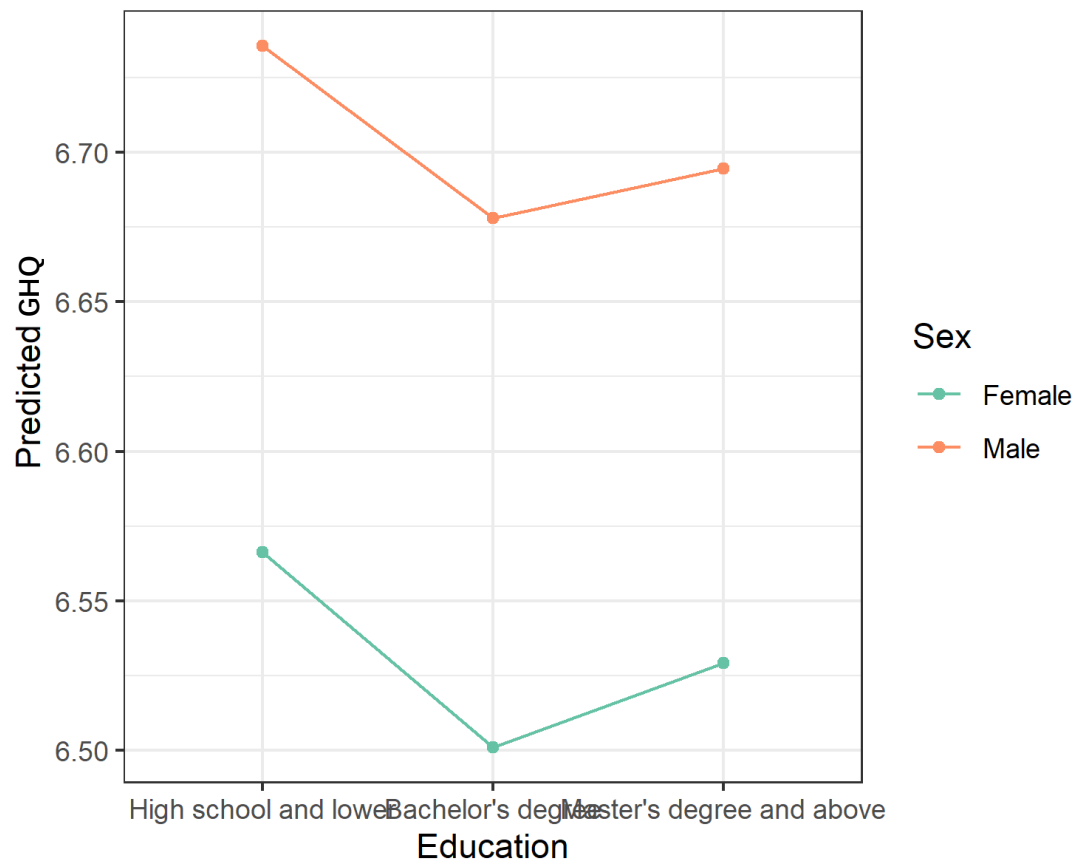

Figure S 8 Bivariate partial dependence plots of employment and education

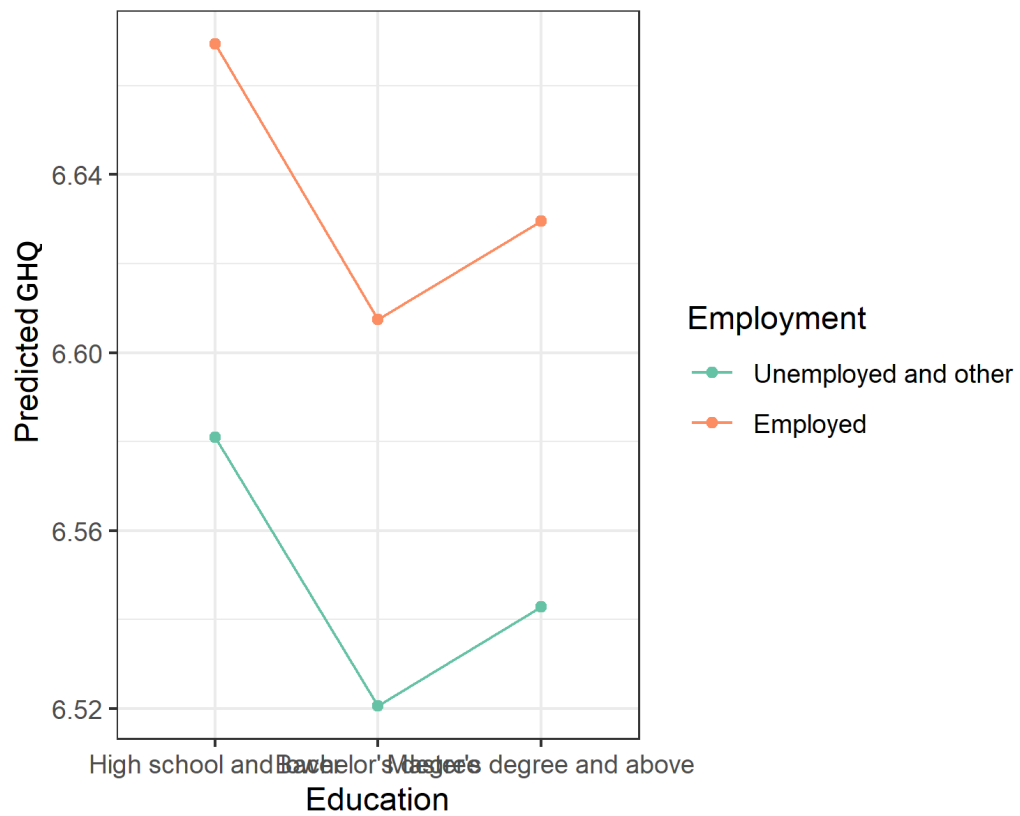

Figure S 9 Bivariate partial dependence plots of hukou type and education

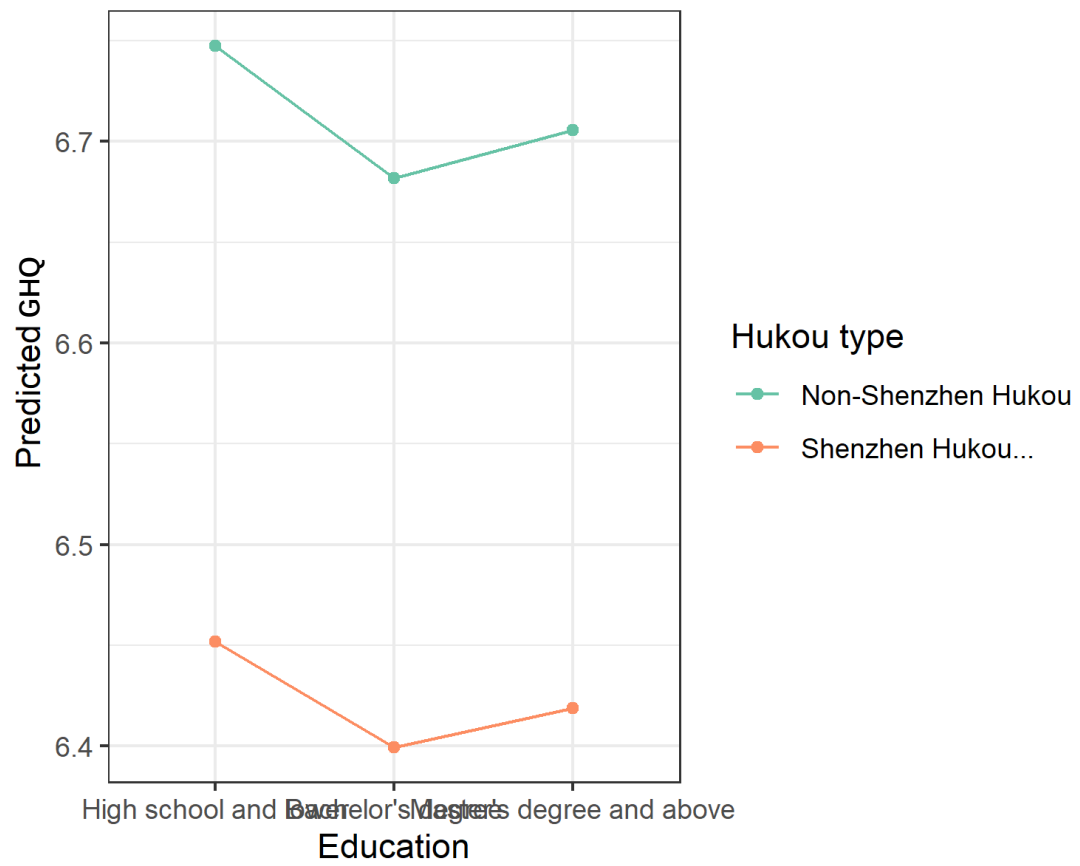

Figure S 10 Bivariate partial dependence plots of migration context and education

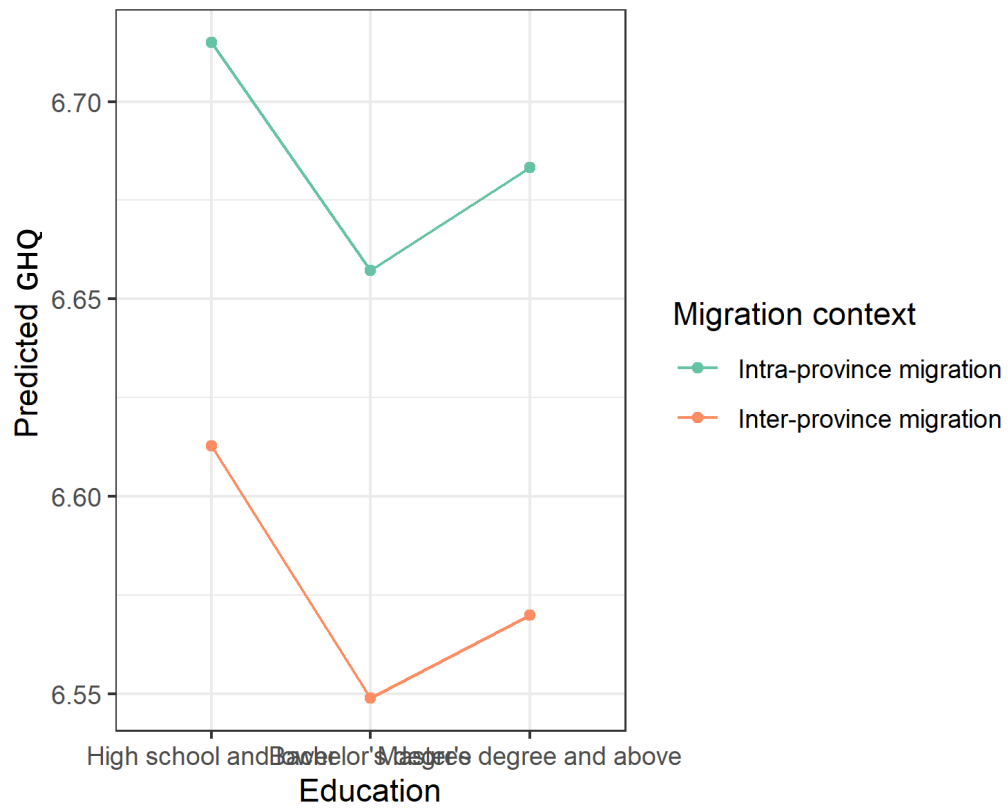

Figure S 11 Bivariate partial dependence plots of hukou type and employment

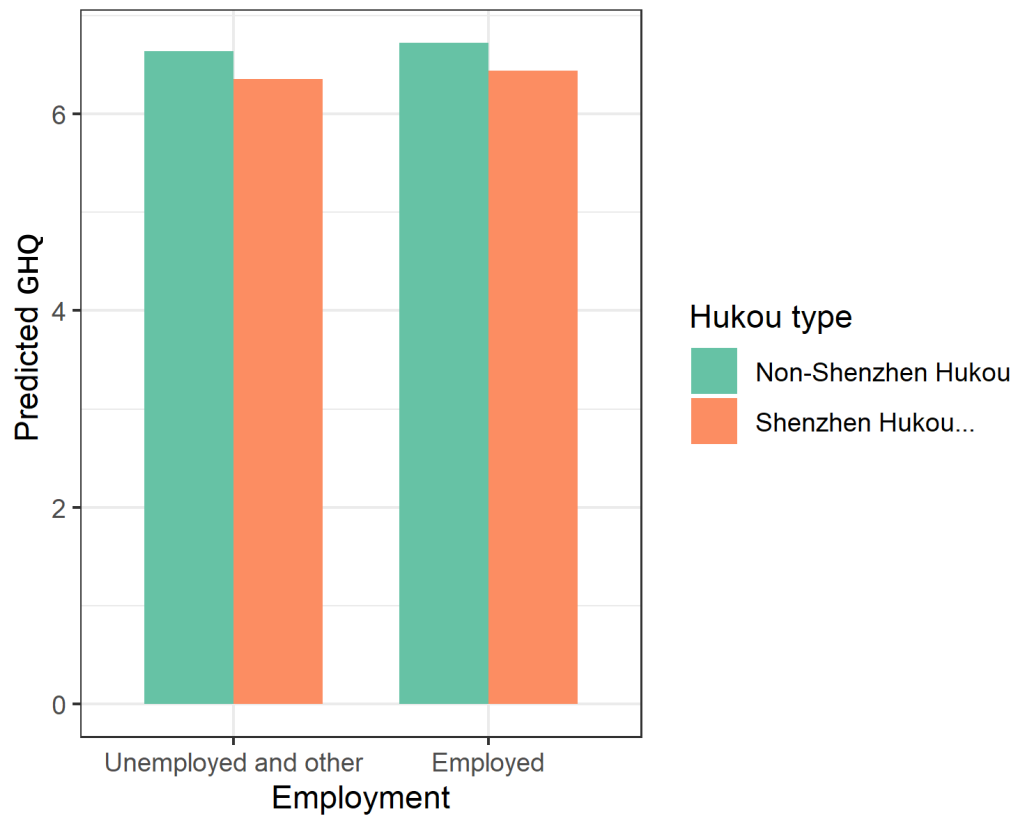

Figure S 12 Bivariate partial dependence plots of migration context and education

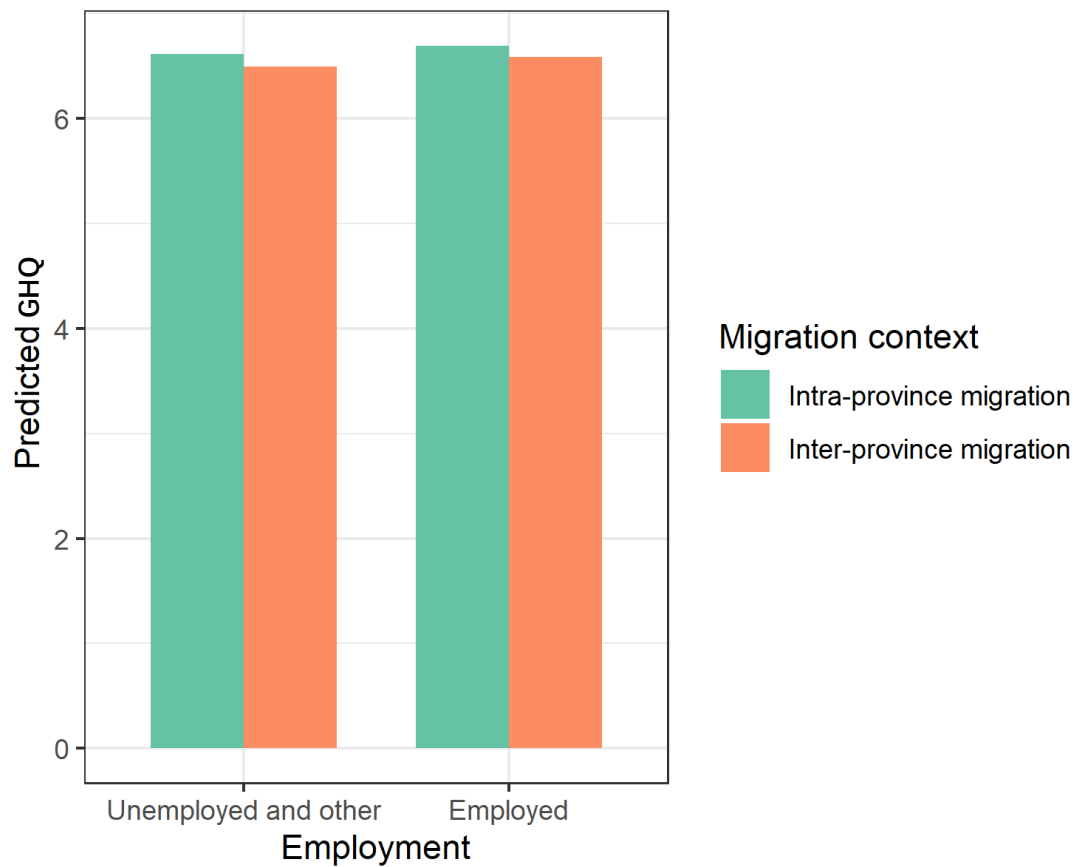

Figure S 13 Bivariate partial dependence plots of sex and employment

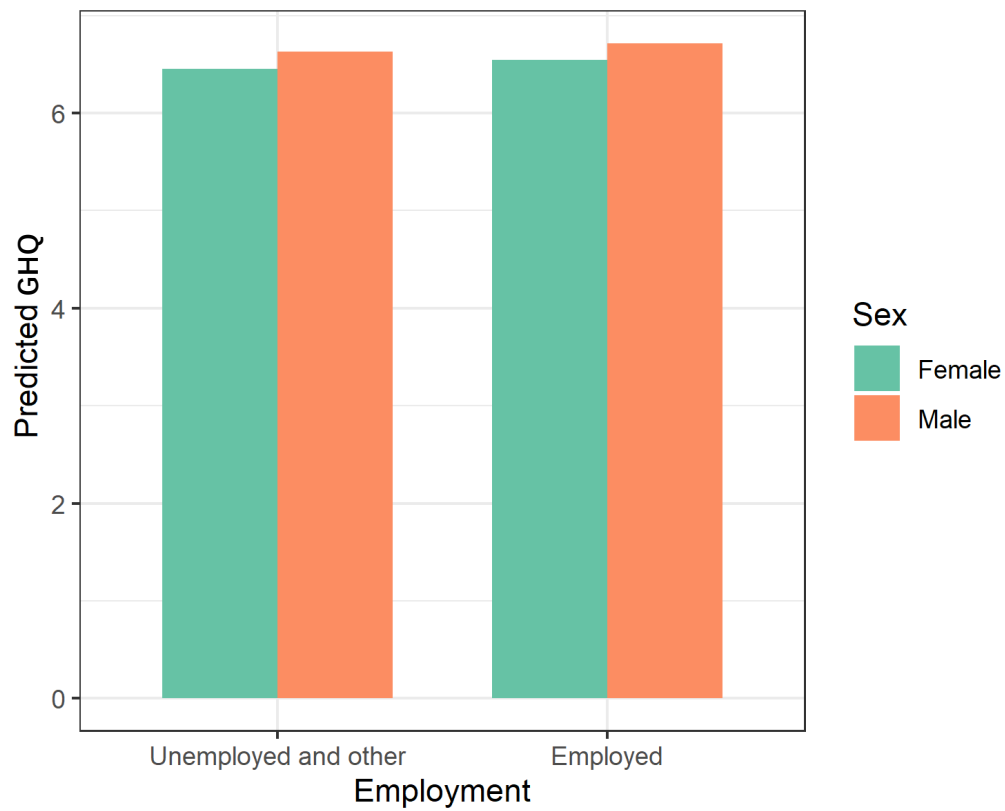

Figure S 14 Bivariate partial dependence plots of hukou type and sex

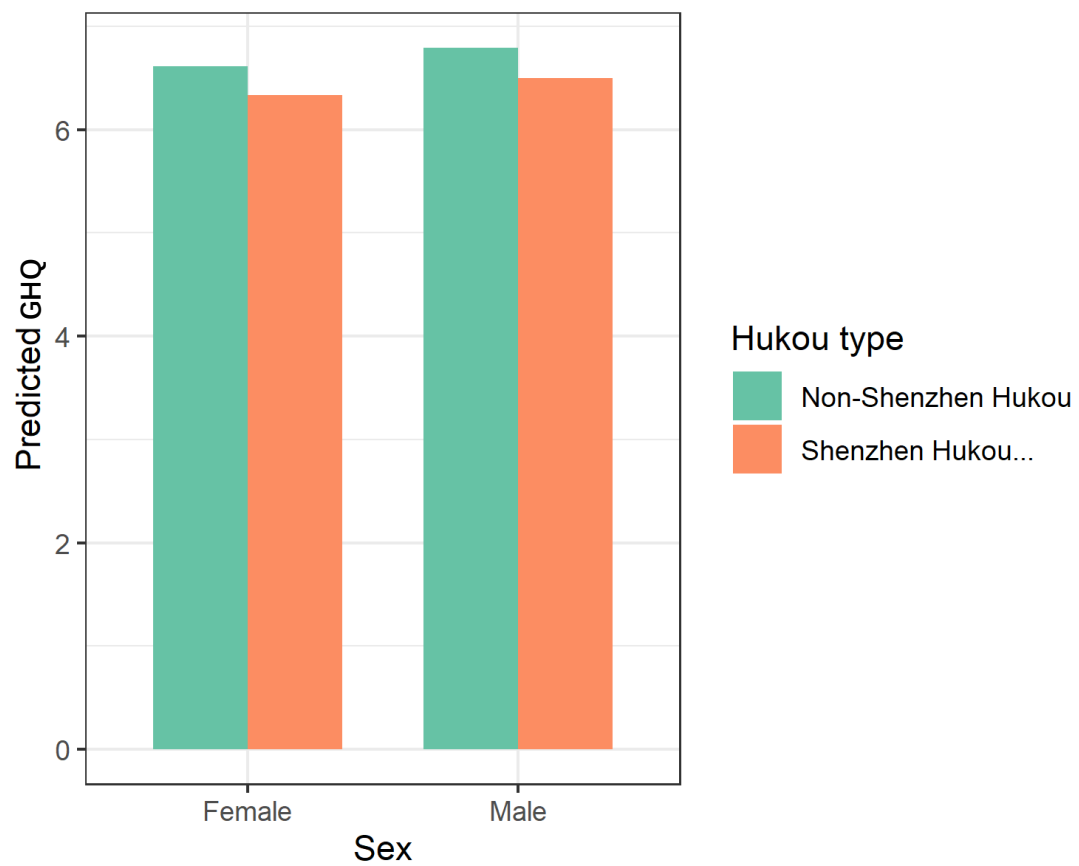

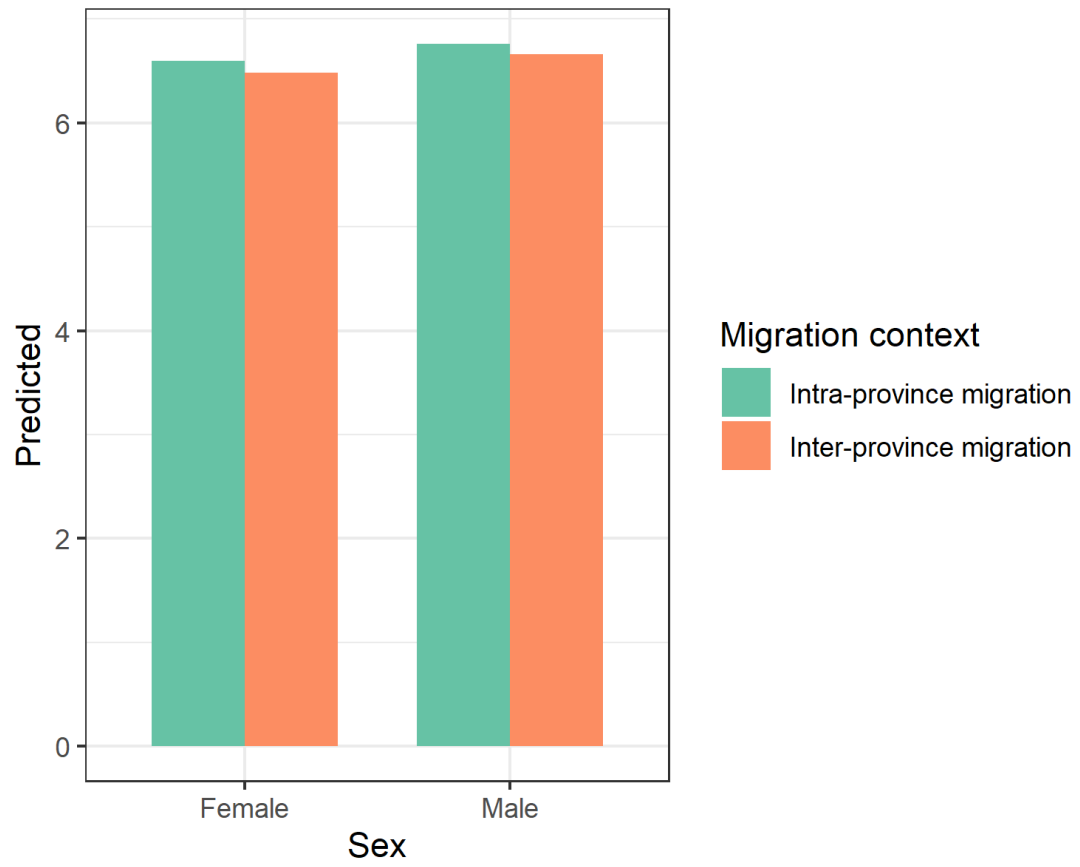

Supplement: MOESM1 [file 19299614]
